# Supplementary material for: COMMD1 disrupts HIF-1α/β dimerization and inhibits human tumor cell invasion
Source: JCI journal article supplement (doi:10.1172/jci40583), 2010-05-10
Supplement: sd1 [file 1]

| <u>Gene</u>             | <u>NF-κB</u> | <u>HIF</u> | <u>Function</u>          |
|-------------------------|--------------|------------|--------------------------|
| <i>COX2</i>             | X            | X          | Prostanoid synthesis     |
| <i>CXCR4</i>            | X            | X          | Chemokine receptor       |
| <i>MMP9</i>             | X            | X          | Matrix remodeling enzyme |
| <i>SERPINE1 (PAI-1)</i> | X            | X          | Fibrinolytic system      |
| <i>SNAI1 (Snail1)</i>   | X            | X          | EMT                      |
| <i>TWIST1</i>           | X            | X          | EMT                      |
| <i>ZEB1</i>             | X            | X          | EMT                      |
| <i>ZEB2</i>             | X            | X          | EMT                      |
| <i>LOX</i>              |              | X          | Matrix remodeling enzyme |
| <i>MET</i>              |              | X          | Growth factor receptor   |

**Figure S1:** Table summarizing the function and regulation of a selected panel of genes investigated in Figure 3.

**Figure S2**  
van de Sluis & Mao, *et al*

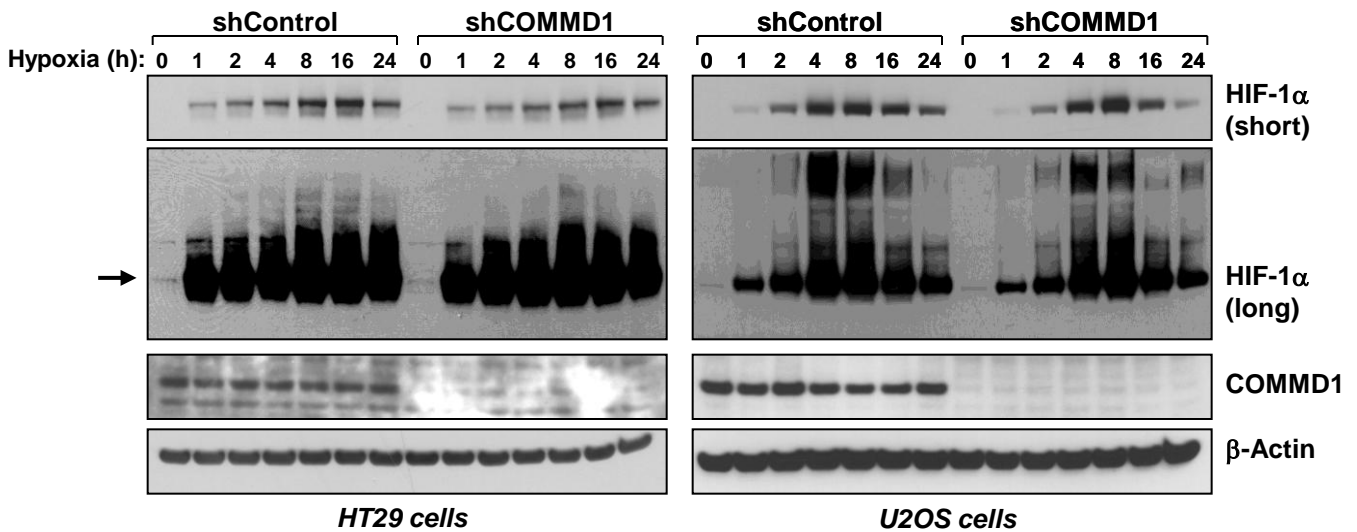

**Figure S2: Time course accumulation of HIF-1α and the effect of COMMD1 deficiency.** The indicated cell lines were placed in a 3% oxygen incubator. After growth under hypoxia for the indicated amounts of time, the cells were promptly lysed and the material was analyzed by western blot as shown. A long exposure of the HIF-1α blot is shown to demonstrate detectable expression under normoxia (arrow).

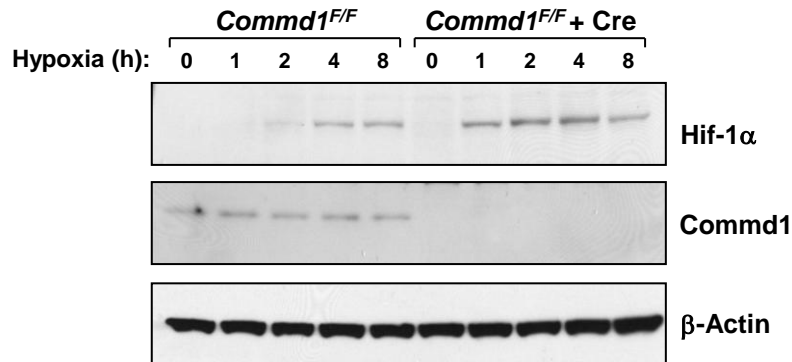

**Figure S3: Hif-1α is stabilized in Commd1 deficient mouse embryo fibroblast (MEFs).** MEFs were obtained from E14 embryos carrying LoxP sites around the first exon of *Commd1* (*Commd1<sup>F/F</sup>*). The cells were immortalized in culture by lentiviral infection to stably express E1A and Ras. These cultures were subsequently infected transiently with adenoviruses expressing the Cre recombinase (*Commd1<sup>F/F</sup> + Cre*) or an adenovirus control expressing LacZ (*Commd1<sup>F/F</sup>*). Loss of *Commd1* expression after Cre expression was confirmed by western blot. Thereafter, the indicated cell lines were placed in a 3% oxygen incubator. After growth under hypoxia for the indicated amounts of time, the cells were promptly lysed and the material was analyzed by western blot as shown.

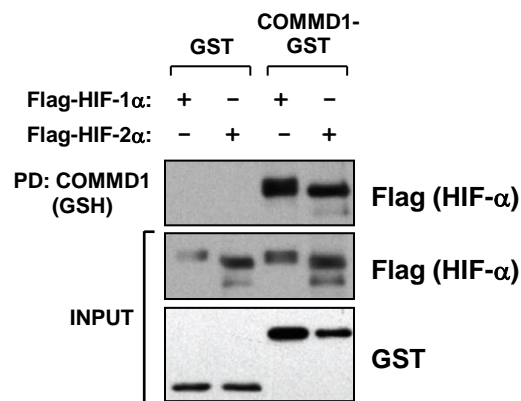

**Figure S4: Coprecipitation between HIF-2 $\alpha$  and COMMD1.** HEK293 cells were cotransfected to express COMMD1-GST (or GST as a control) along with HIF-1 $\alpha$  or HIF-2 $\alpha$ . Upon harvesting of cellular lysates, COMMD1-GST was precipitated and the presence of either HIF- $\alpha$  subunit was determined by immunoblotting.

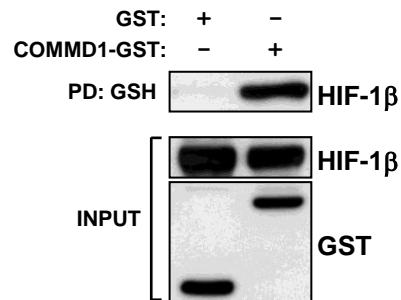

**Figure S5: Coprecipitation between HIF-1β and COMMD1.** HEK293 cells were cotransfected to express COMMD1-GST (or GST as a control) along with HIF-1β. Upon harvesting of cellular lysates, COMMD1-GST was precipitated and the presence of HIF-1β was determined by immunoblotting.

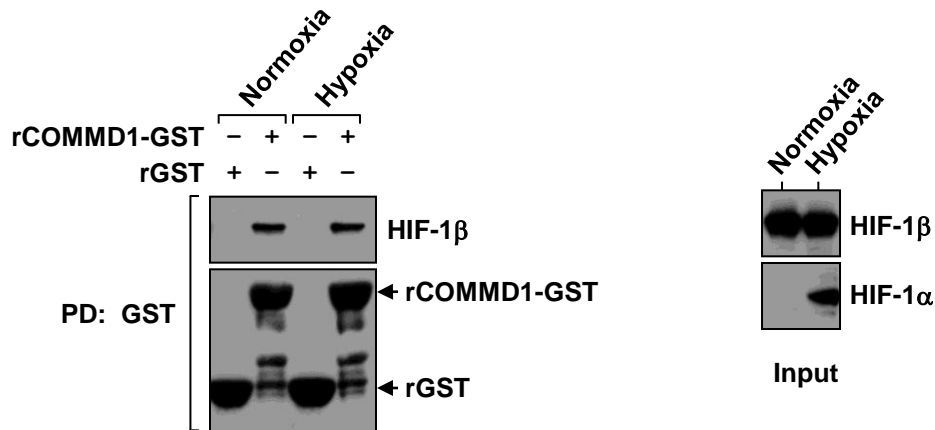

**Figure S6: *In vitro* binding between HIF-1β and COMMD1.** Lysates were obtained HEK293 cells under normoxic or hypoxic conditions (3% oxygen for 6 hours). The accumulation of HIF-1α was demonstrated in the input material immunoblotted for either HIF-1β or -1α (right panel). These lysates were mixed with recombinant COMMD1-GST or GST proteins prepared in *E. coli*. After a 3 hour incubation at 4 °C, the recombinant proteins were precipitated from the lysate and the presence of bound endogenous HIF-1β was determined by immunoblotting.

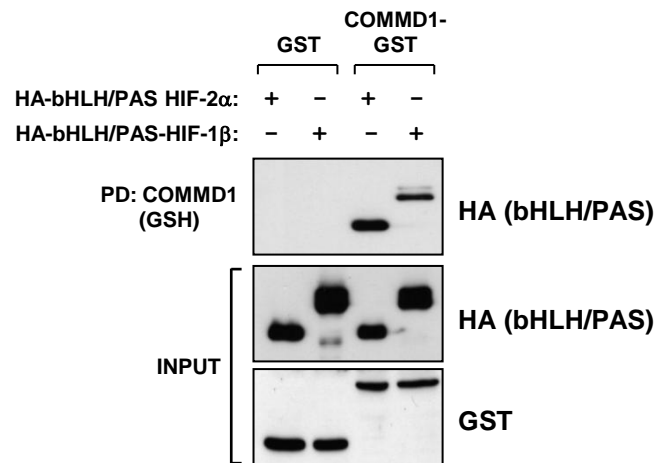

**Figure S7: COMMD1 binds to the bHLH/PAS domains of HIF-2 $\alpha$  and HIF-1 $\beta$ .**

HEK293 cells were cotransfected to express COMMD1-GST (or GST as a control) along with the indicated bHLH/PAS domains of HIF-2 $\alpha$  or HIF-1 $\beta$ . Upon harvesting of cellular lysates, COMMD1-GST was precipitated and the presence of associated bHLH/PAS truncated proteins was determined by immunoblotting.
